# Supplementary material for: Analysis of Circulating Food Antigen-Specific T-Cells in Celiac Disease and Inflammatory Bowel Disease
Source: MDPI journal article supplement (doi:10.3390/ijms24098153), 2023-05-02
Supplement: s1 [file s1]

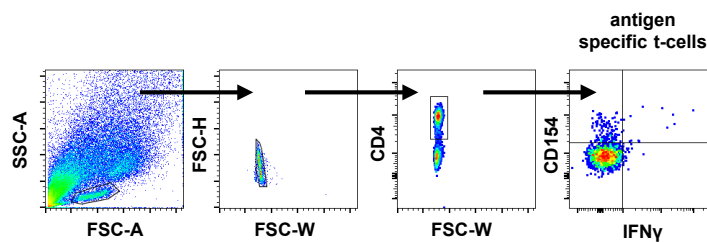

Figure S1. Gating strategy after magnetic enrichment of CD154+ (antigen specific) t cells

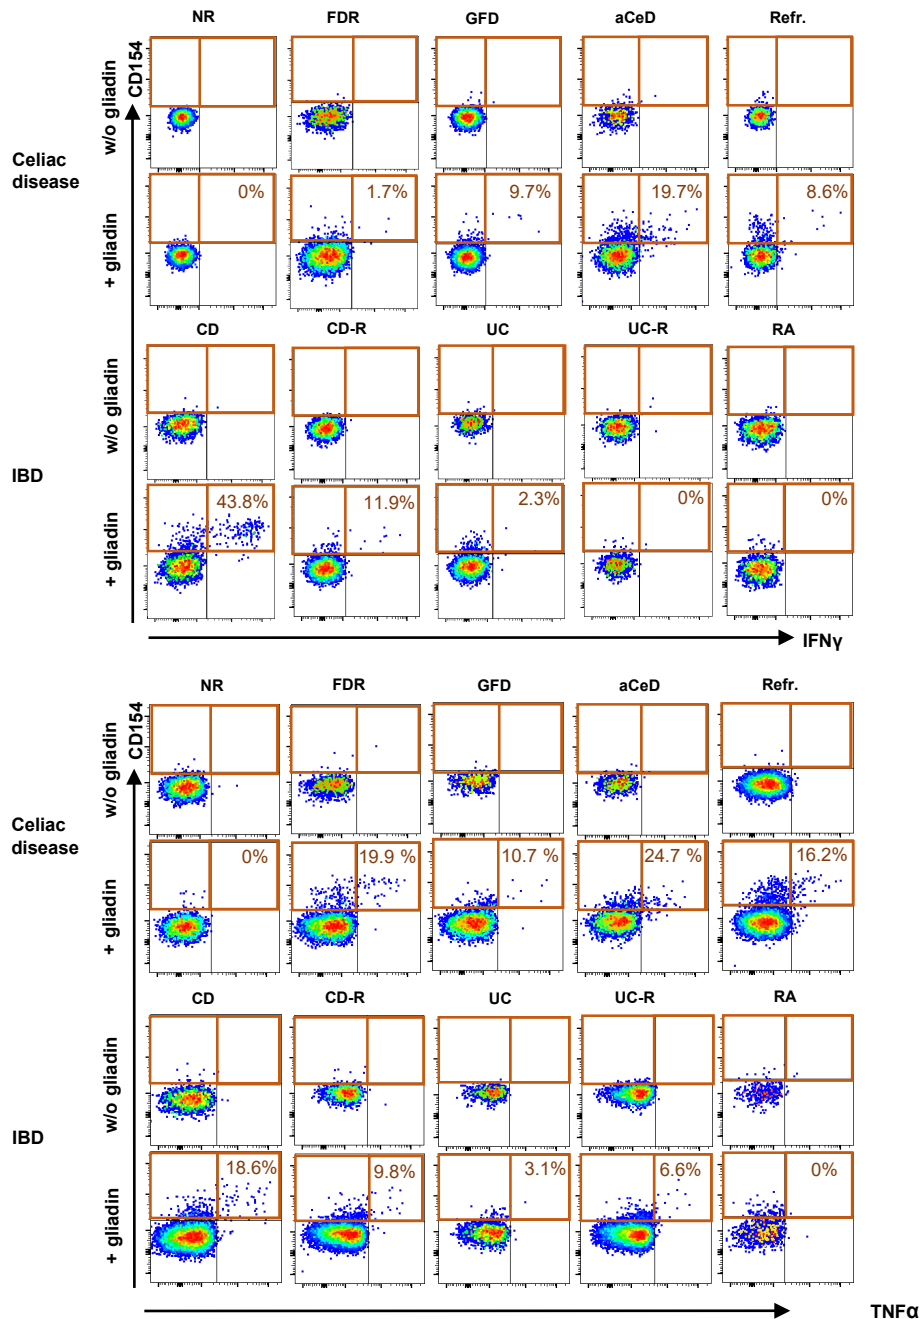

Figure S2. Cytokine frequencies of antigen (gliadin)-specific T-cells. Representative density plots illustrating the expression and frequency of IFN $\gamma$ + and TNF $\alpha$ + producing cells are shown as percentage within the CD154+ cells from healthy non-relatives (NR), first-degree relatives (FDR), Crohn's disease (CD), Ulcerative colitis (UC), active or in remission (-R), celiac disease patients (CeD)  $\pm$  gluten-free diet (GFD), refractory (Refr) patients and rheumatoid arthritis patients (RA) are shown  $\pm$  gliadin stimulation.
